# Supplementary material for: Mosquito (Diptera: Culicidae) Fauna of a Zoological Park in an Urban Setting: Analysis of Culex pipiens s.l. and Their Biotypes
Source: MDPI journal article supplement (doi:10.3390/insects15010045), 2024-01-09
Supplement: s1 [file s1]

## Supplementary data

Figure S1 – Map of the city of Lisbon with the relative location of Lisbon Zoo (1), Monsanto urban park (2), the Tagus River (3) and the meteorological station (4).

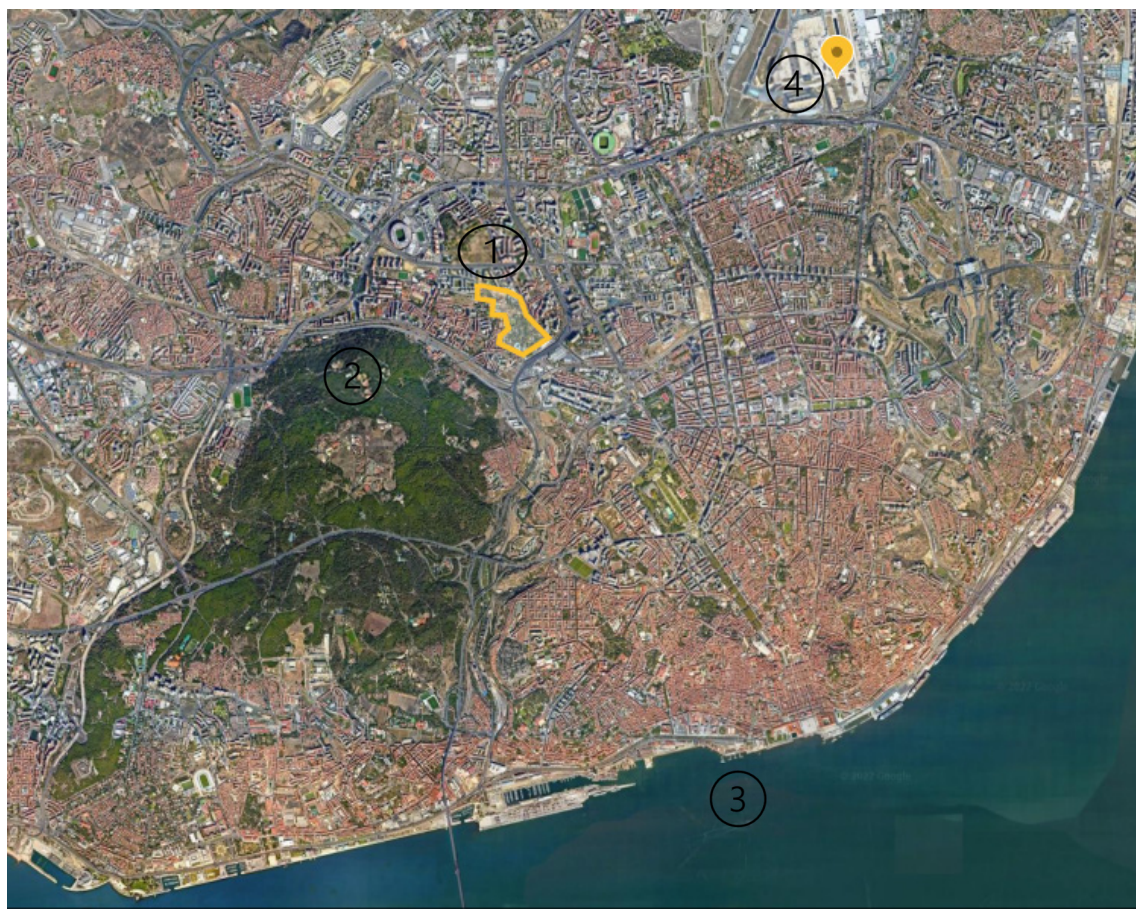

Figure S2 – Location of adult mosquito traps at Lisbon Zoo.

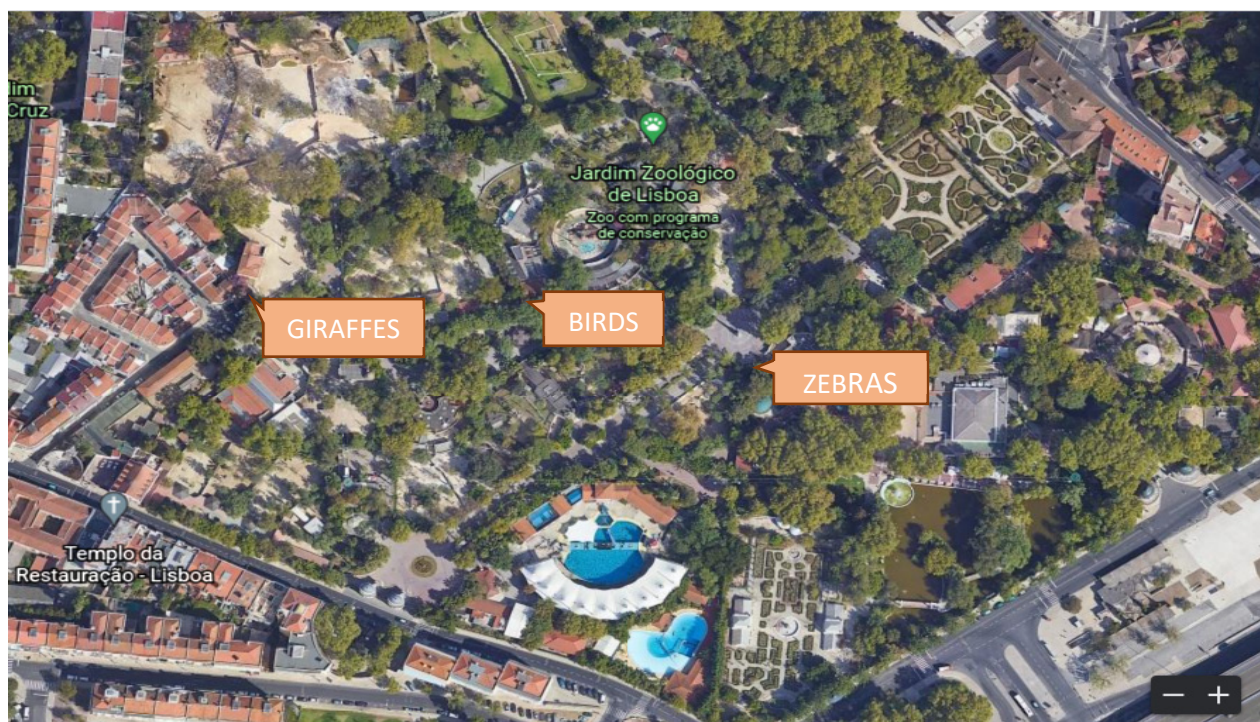

Figure S3 – Species accumulation curve of mosquitoes sampled at Lisbon Zoo.

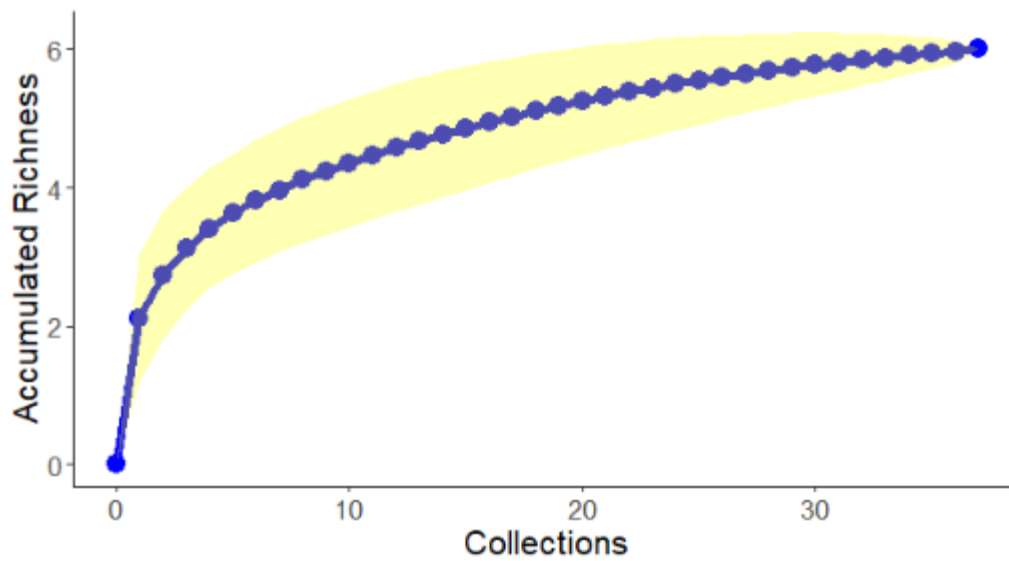

Table S1 - Weather variables and respective time aggregation used for the GLM models for *Culex pipiens* abundance.

| <i>Weather variable</i>       | <i>Aggregation</i> | <i>Time Lag</i>     |
|-------------------------------|--------------------|---------------------|
| <i>Maximum Temperature</i>    | average            | Week before capture |
|                               | average            | Week of capture     |
|                               | --                 | Day of capture      |
| <i>Minimum Temperature</i>    | average            | Week before capture |
|                               | average            | Week of capture     |
|                               | --                 | Day of capture      |
| <i>Average Temperature</i>    | average            | Week before capture |
|                               | average            | Week of capture     |
|                               | --                 | Day of capture      |
| <i>Precipitation</i>          | Yes or no          | Day of capture      |
|                               | average            | Week before capture |
|                               | average            | Week of capture     |
|                               | Accumulated (sum)  | Week before capture |
| <i>Relative humidity (RH)</i> | average            | Week before capture |
|                               | average            | Week of capture     |
| <i>Wind Intensity</i>         | average            | Week of capture     |
|                               | -                  | Day of capture      |
